# Supplementary material for: Combining ropivacaine transversus abdominis plane block with intravenous lidocaine infusion in adults undergoing colorectal cancer surgery: an open-label, dose-escalation exploratory trial
Source: Research Square preprint supplement (doi:10.21203/rs.3.rs-5690114/v1), 2025-03-27
Supplement: Supplementary file 1 [file f3493093cbd53b2f64d6c5eb.docx]

Supplementary **Figure S1**: Image of the transversus abdominis plane block.EO, external oblique; IO, internal oblique; TA, transversus abdominis; Grey curve: the range of ropivacaine diffusion

Supplementary **Figure S2**: Patients enrolment timeline.

Supplementary **Table 1**: Intraoperative hemodynamics changes over times.

Supplementary **Figure S3**: A representative image of electroencephalography during general anaesthesia

Supplementary **Figure S4:** Median plasma concentration of ropivacaine at each time point in the PP analysis(A) and ITT analysis(B). PP, per-protocol; ITT, intention-to-treat.

Supplementary **Figure S5**: Median plasma concentration of ropivacaine within each group in the PP analysis(A) and ITT analysis(B). PP, per-protocol; ITT, intention-to-treat.

Supplementary **Figure S6**: Median plasma concentration of lidocaine at each time point in the PP analysis(A) and ITT analysis(B). PP, per-protocol; ITT, intention-to-treat.

Supplementary **Figure S7**: Median plasma concentration of lidocaine in the PP analysis and ITT analysis. PP, per-protocol; ITT, intention-to-treat.


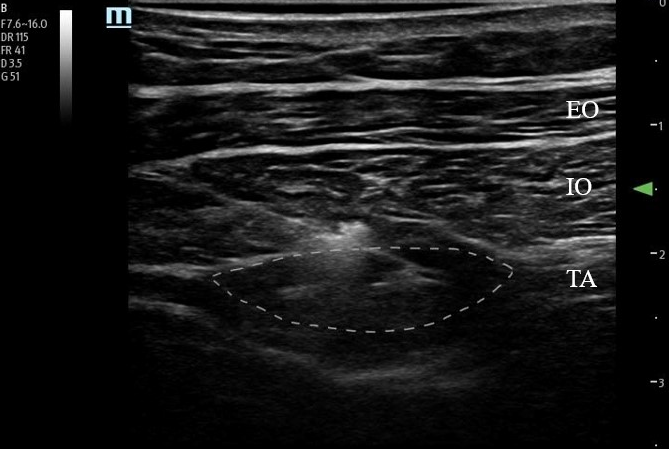
Supplementary **Figure S1**: Image of the transversus abdominis plane block.EO, external oblique; IO, internal oblique; TA, transversus abdominis; Grey curve: the range of ropivacaine diffusion.


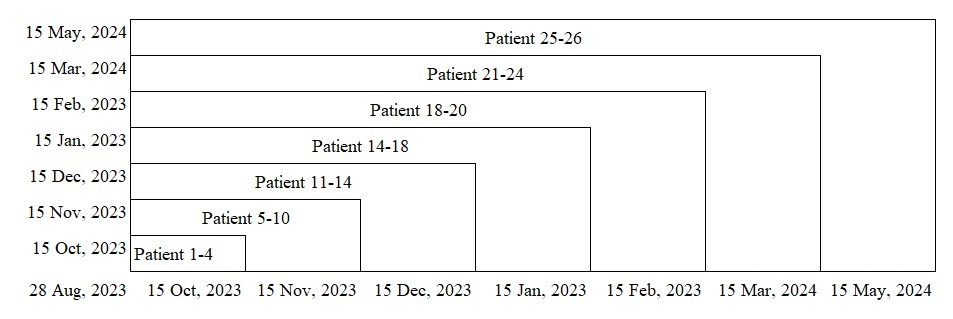


Supplementary **Figure S2**: Patients enrolment timeline.

Supplementary **Table 1** Intraoperative hemodynamic change over times

|  | 1.5 mg kg-1 group  n=10 | 2.0mg kg-1 group  n=8 | 2.5mg kg-1 group  n=8 | All  n=26 |
| --- | --- | --- | --- | --- |
| SBP | | | | |
| 10min | 101(93-127) | 108(96-127) | 100(97-129) | 102(95-123) |
| 20min | 117(100-126) | 99(94-119) | 108(100-130) | 105(98-123) |
| 30min | 115(104-138) | 101(95-117) | 100(94-112) | 105(98-121) |
| 45min | 116(100-139) | 111(102-113) | 106(92-116) | 112(99-118) |
| 60min | 99(97-111) | 103(97-110) | 109(100-120) | 102(98-112) |
| 90min | 106(99-112) | 105(99-112) | 102(102-112) | 104(99-112) |
| DBP | | | | |
| 10min | 68(61-80) | 68(59-69) | 64(58-83) | 67(60-75) |
| 20min | 70(62-80) | 61(53-69) | 70(60-85) | 68(59-76) |
| 30min | 66(64-81) | 58(53-67) | 64(56-68) | 65(58-67) |
| 45min | 74(64-87) | 66(59-69) | 66(54-77) | 68(59-77) |
| 60min | 66(59-68) | 66(57-69) | 68(66-70) | 67(61-69) |
| 90min | 65(55-71) | 65(53-71) | 66(62-73) | 66(61-72) |
| HR | | | | |
| 10min | 65(51-76) | 59(54-65) | 57(52-68) | 60(53-68) |
| 20min | 66(56-73) | 57(55-58) | 60(52-63) | 58(56-64) |
| 30min | 68(57-71) | 58(53-60) | 56(52-63) | 58(54-67) |
| 45min | 59(55-71) | 59(53-66) | 56(52-59) | 57(54-63) |
| 60min | 60(54-72) | 60(55-64) | 57(53-66) | 59(54-67) |
| 90min | 59(53-72) | 64(69-67) | 59(51-72) | 61(55-71) |

Data are presented as median (interquartile range); SBP, systolic blood pressure; DBP, diastolic blood pressure; HR, heart rate.


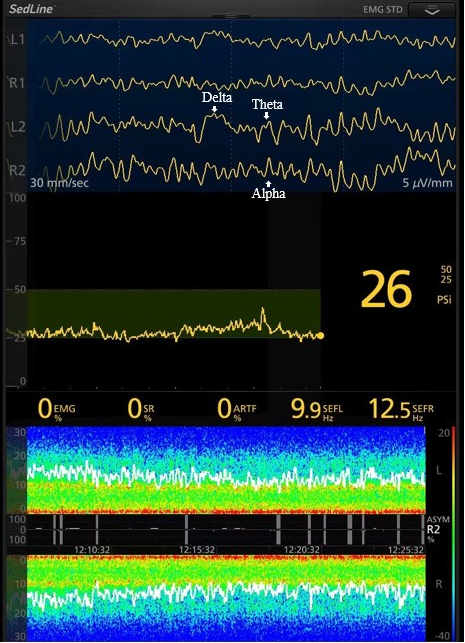


Supplementary **Figure S3**: A representative image of electroencephalography during general anesthesia


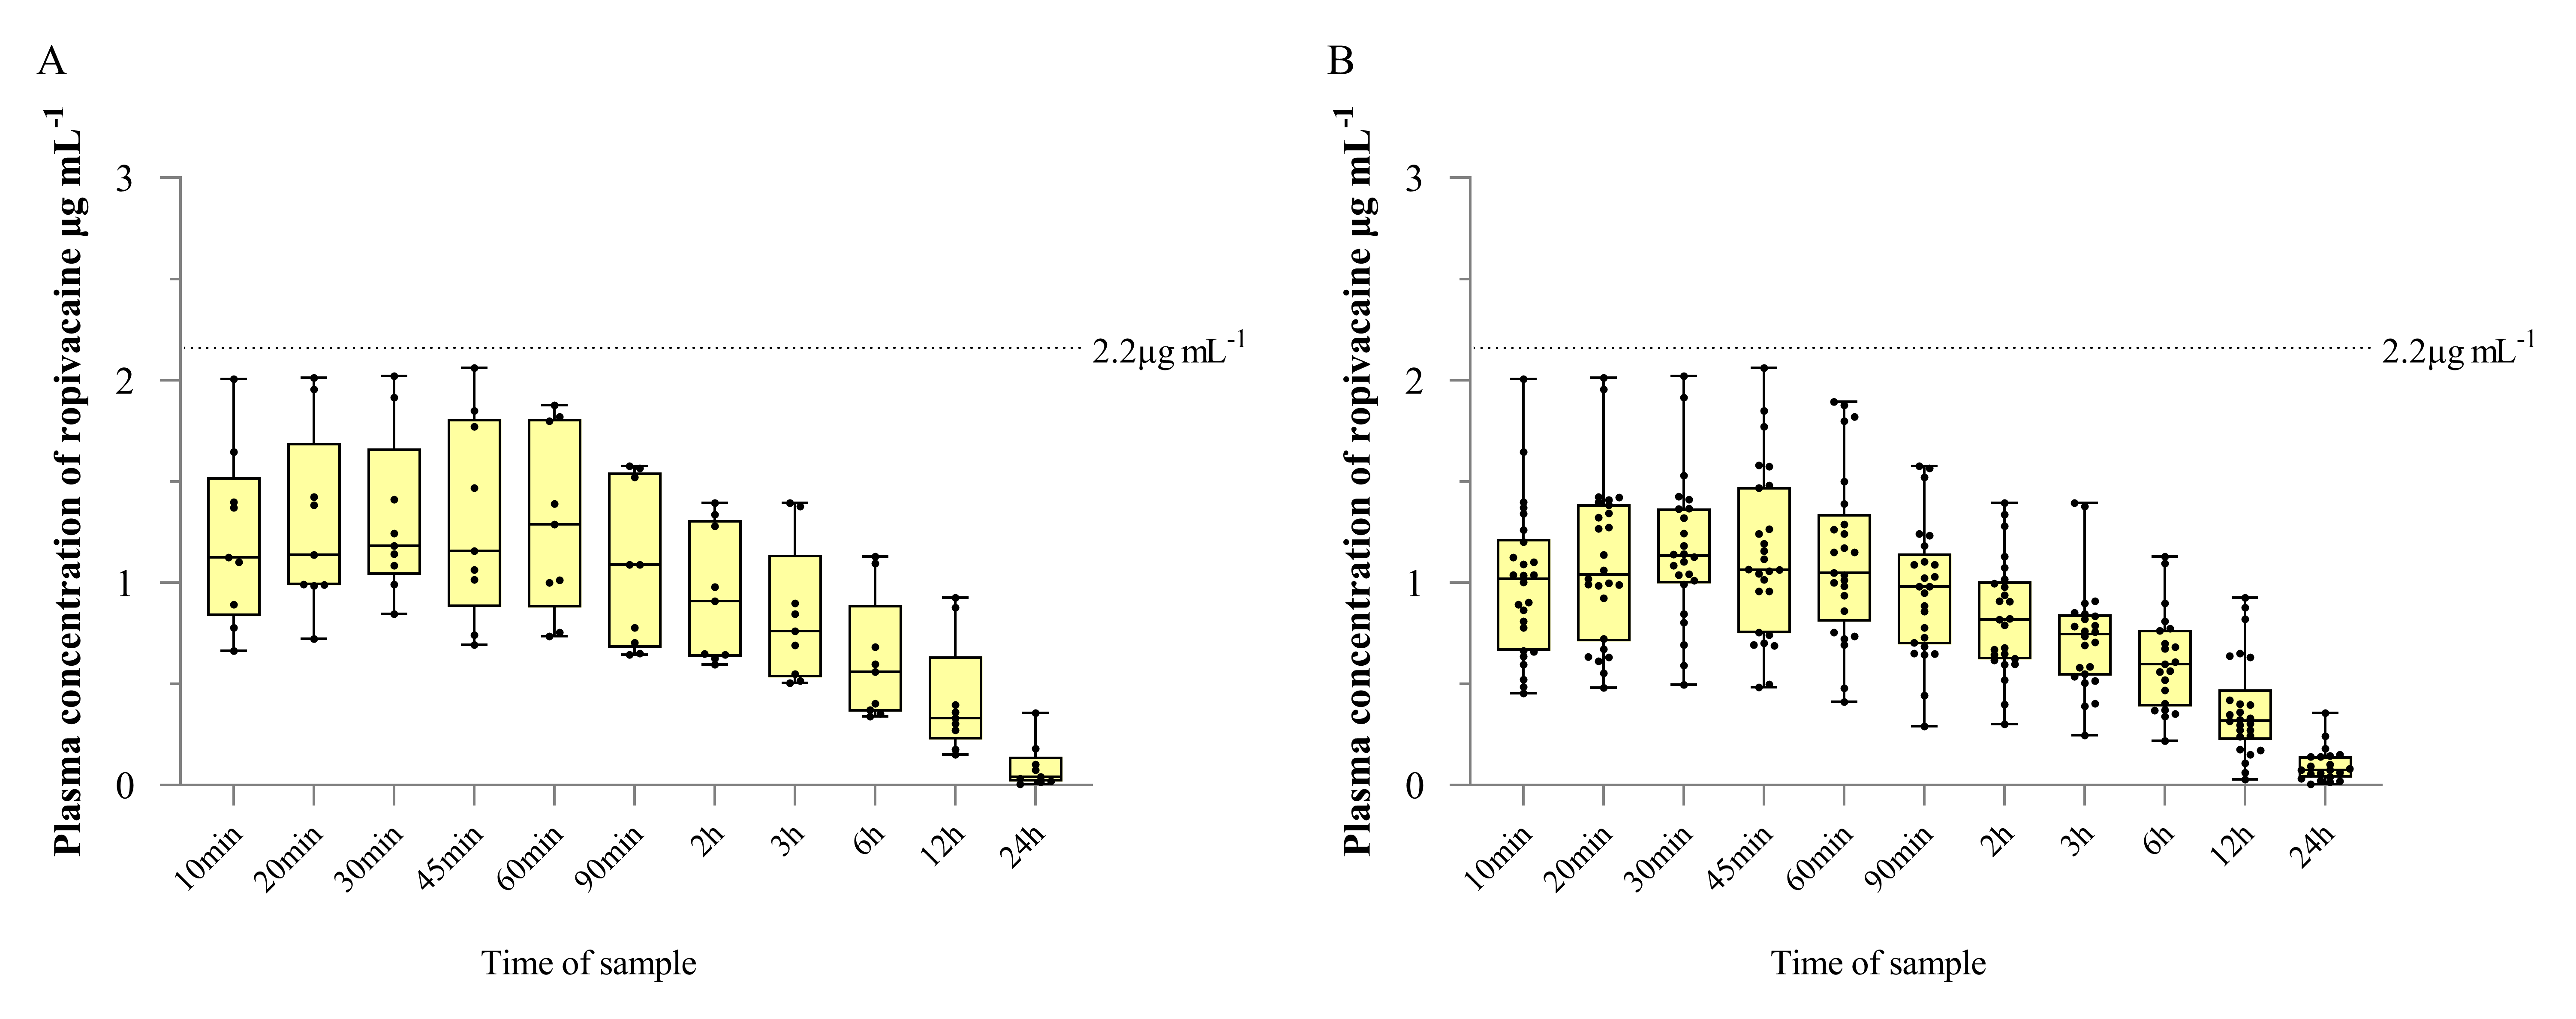


Supplementary **Figure S4**: Median plasma concentration of ropivacaine at each time point in the PP analysis(A) and ITT analysis(B). PP：per-protocol; ITT：intention-to-treat.


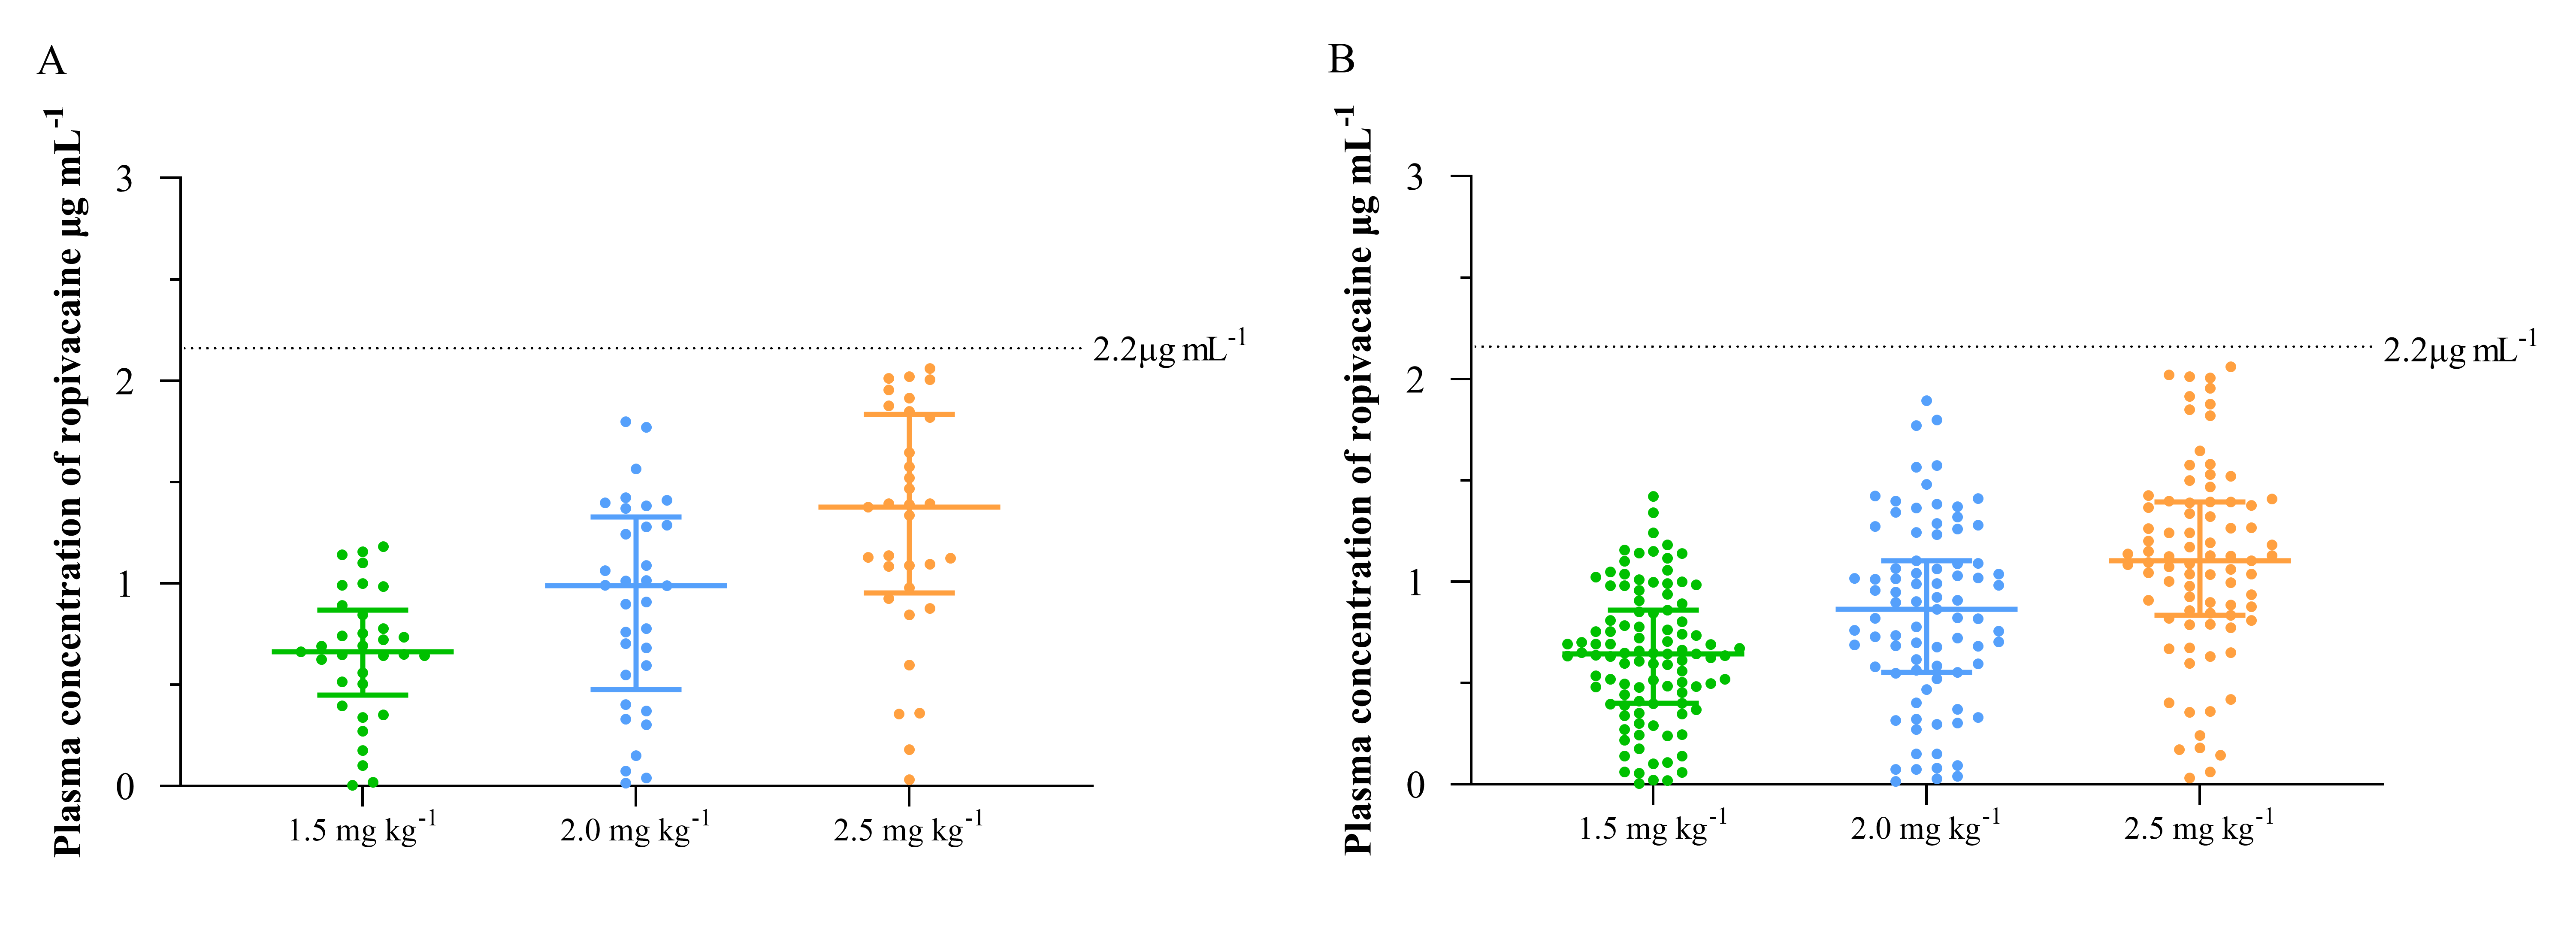


Supplementary **Figure S5**: Median plasma concentration of ropivacaine within each group in the PP analysis(A) and ITT analysis(B). PP：per-protocol; ITT：intention-to-treat.

**
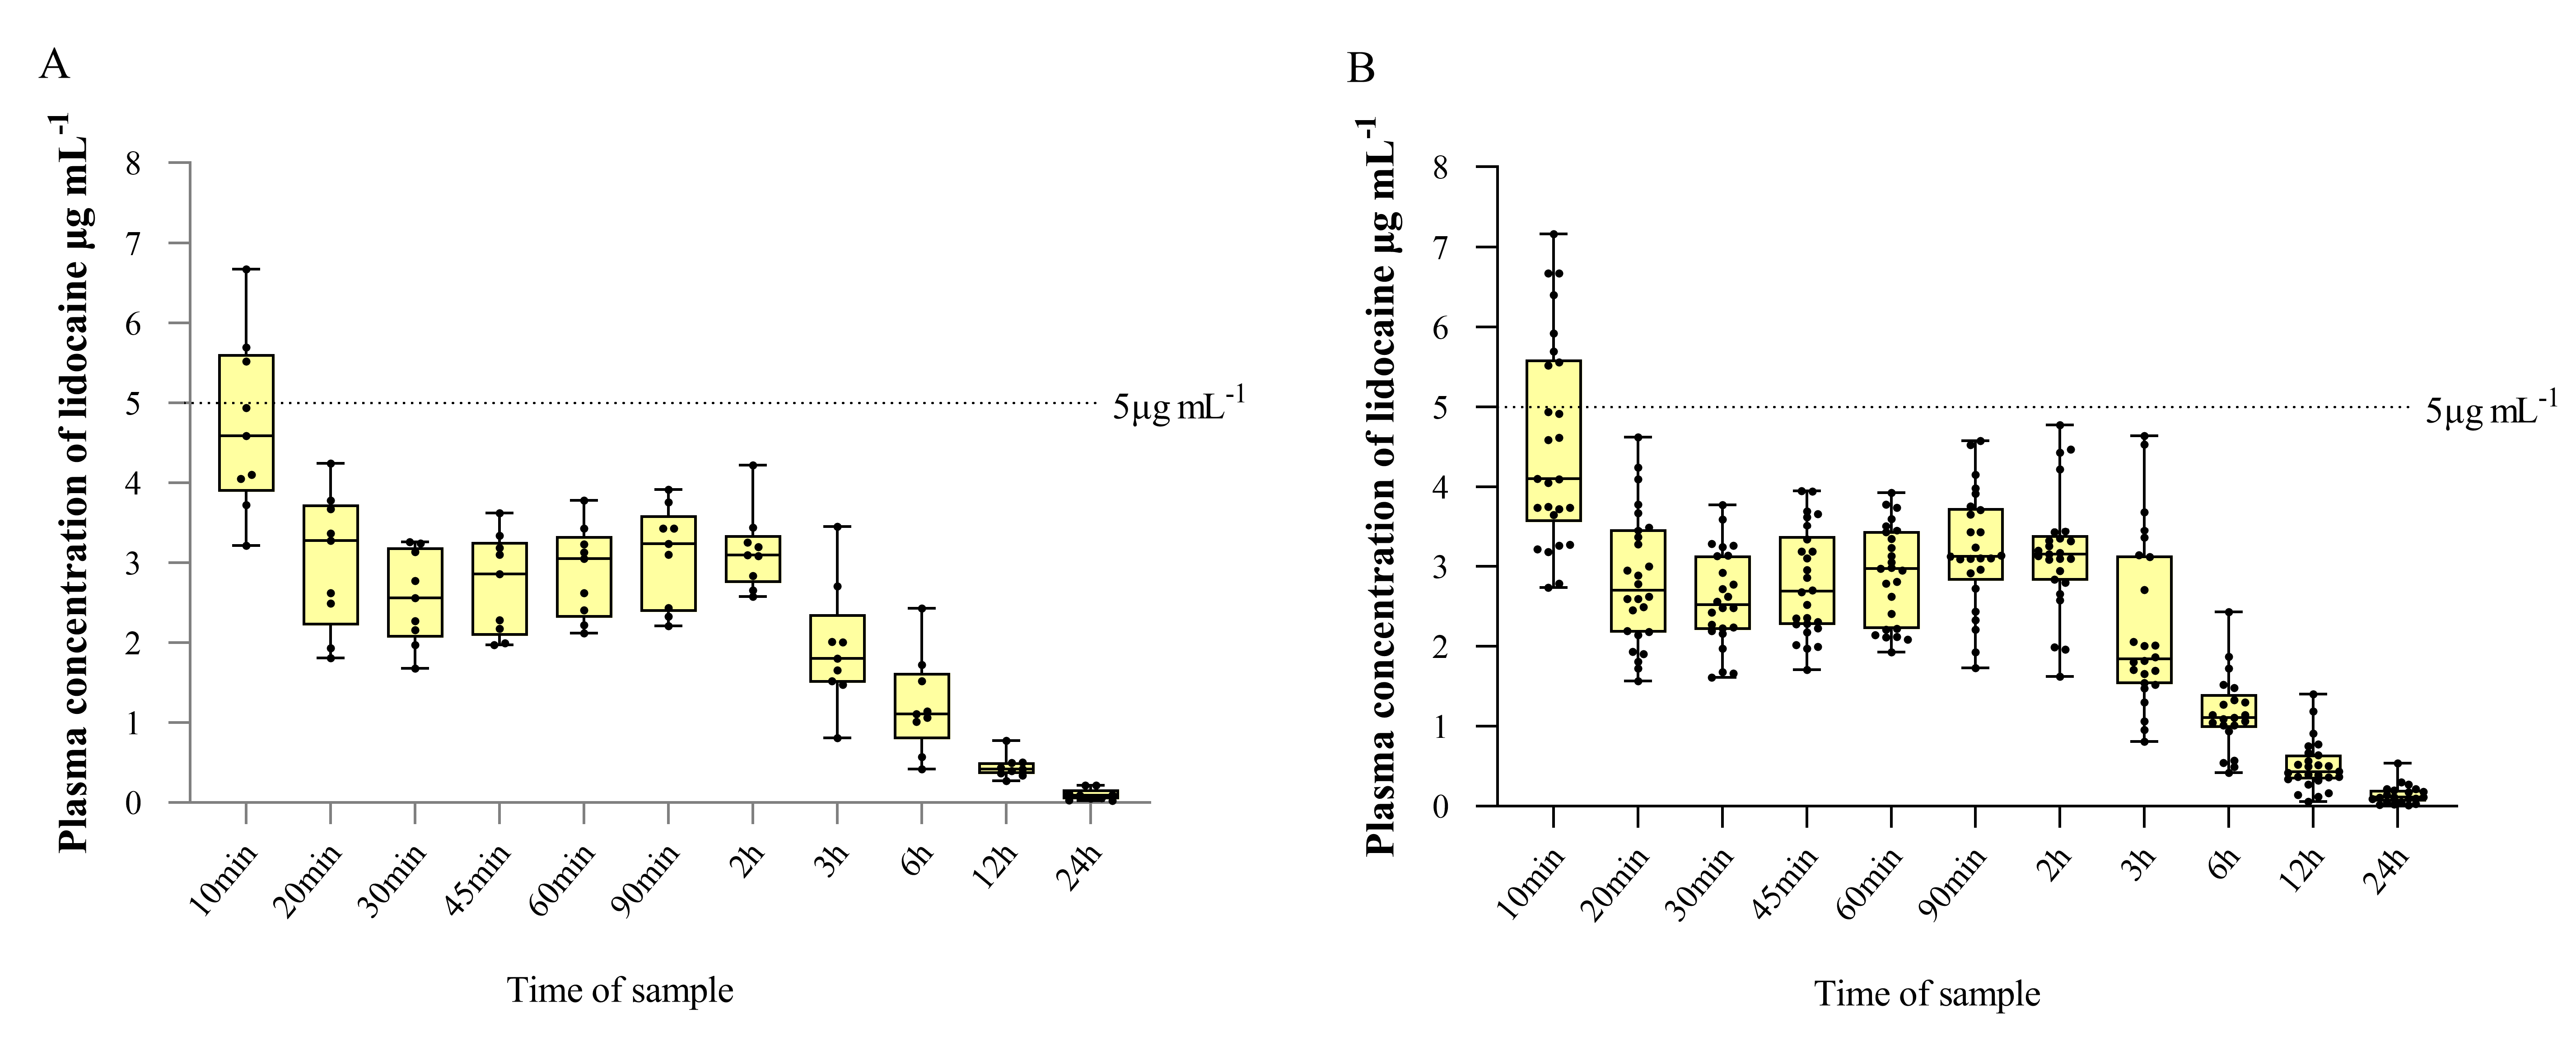
**

Supplementary **Figure S6**: Median plasma concentration of lidocaine at each time point in the PP analysis(A) and ITT analysis(B). PP：per-protocol; ITT：intention-to-treat.

**
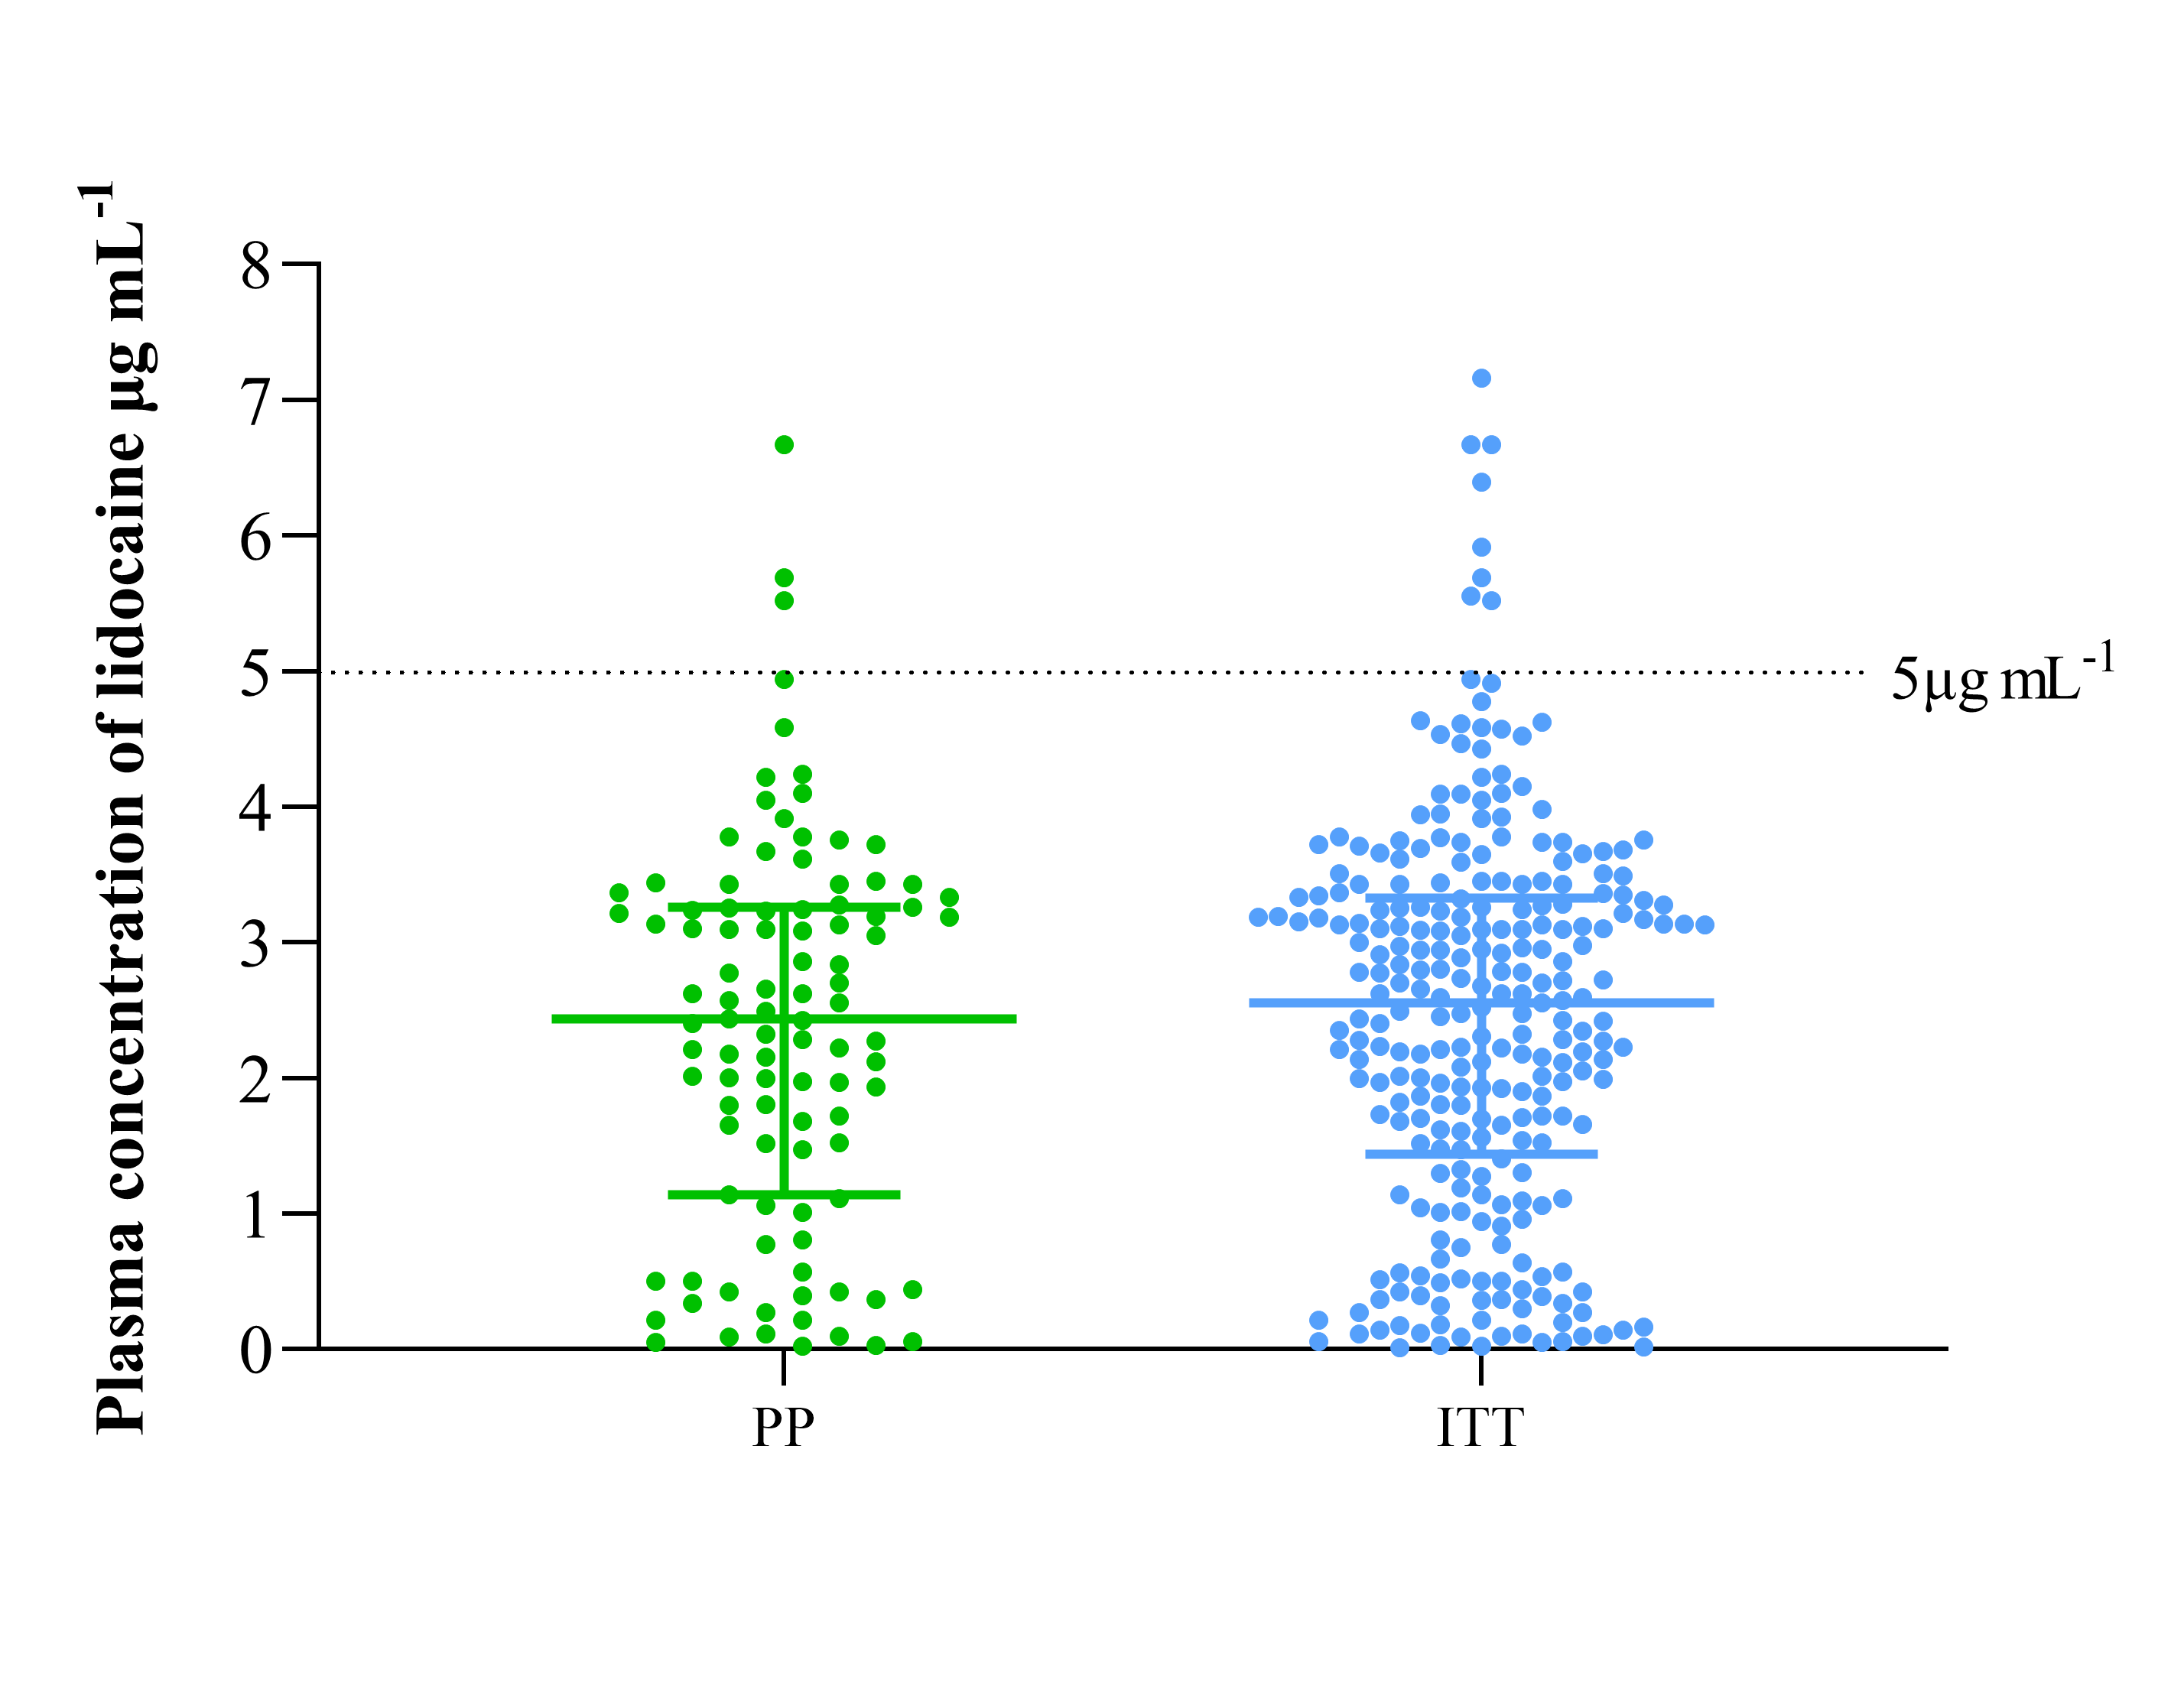
**

Supplementary **Figure S7**: Median plasma concentration of lidocaine in the PP analysis and ITT analysis. PP：per-protocol; ITT：intention-to-treat.
